# Supplementary material for: Effects of Sound-based Meditative Healing Method on Stress, Tension, Cortisol’s Level &amp; Blood Pressure: A Randomised Controlled Trial
Source: Research Square preprint supplement (doi:10.21203/rs.3.rs-7554543/v2), 2025-09-17
Supplement: Supplementary file 1 [file e7ea399a6be9614a1b5994fe.docx]

**Table 1**

| Characteristic | All (n = 100) | Males (n = 50) | Females (n = 50) |
| --- | --- | --- | --- |
| Age in years, mean (SD) | 49.7 (13.0) | 42.0 (15.8) | 51.0 (12.0) |
| Education Background |  |  |  |
| High school | 10 | 12 | 8 |
| Some college | 30 | 28 | 32 |
| BA/BS | 35 | 34 | 36 |
| Masters | 20 | 18 | 22 |
| PhD/MD | 5 | 8 | 2 |
| Marital Status |  |  |  |
| Single | 40 | 45 | 35 |
| Partner | 10 | 12 | 8 |
| Married | 30 | 25 | 25 |
| Divorced | 18 | 15 | 20 |
| Widowed | 2 | 3 | 2 |
| Meditation experience, % |  |  |  |
| Yes | 80 | 85 | 75 |
| No | 20 | 15 | 25 |
| Bowl experience, % |  |  |  |
| Yes | 60 | 58 | 62 |
| No | 40 | 42 | 38 |

*Table 2*

| **Measure** | **n** | **Pre Mean** | **Pre SD** | **Post Mean** | **Post SD** | **Change Mean** | **p-**  **value** | **η**2 |
| --- | --- | --- | --- | --- | --- | --- | --- | --- |
| HADS_Anxiety | 100 | 10.29 | 2.72 | 9 | 2.96 | -1.29 | 0.004 | 0.08 |
| HADS_Depression | 100 | 10.19 | 3.25 | 8.58 | 2.68 | -1.62 | 0.000 | 0.13 |
| Cortisol_Level | 100 | 15.23 | 1.28 | 13.52 | 1.62 | -1.71 | 0.000 | 0.4 |
| Blood Pressure | 100 | 130.12 | 5.34 | 124.4 | 5.81 | -5.72 | 0.000 | 0.33 |

*Table 2 shows the average means and standard divisions before and after sound-based meditation, and the abbreviations include the Hospital Anxiety & Depression Scale (HADS)* (Snaith)*. Tension, anger and stress are analysed via the Profile of Mood States (POMS-SF)* (Shacham)*.*

*Table 3*

| **Measure** | **Group** | **n** | **Pre Mean** | **Pre SD** | | **Post Mean** | **Post SD** | **Change Mean** | **p-**  **value** | **η**2 | **Significance** |
| --- | --- | --- | --- | --- | --- | --- | --- | --- | --- | --- | --- |
| Tension (POMS) | Control | 50 | 9.92 | 2.8 | 10.28 | | 3.05 | 0.36 | 0.567 | 0.01 | No |
| Tension (POMS) | Experimental | 50 | 10.65 | 2.62 | 7.71 | | 2.23 | -2.94 | 0.000 | 0.39 | Yes |
| Anxiety (HADS) | Control | 50 | 9.92 | 2.8 | 10.28 | | 3.05 | 0.36 | 0.567 | 0.01 | No |
| Anxiety (HADS) | Experimental | 50 | 10.65 | 2.62 | 7.71 | | 2.23 | -2.94 | 0.000 | 0.39 | Yes |
| Depressed Mood (HADS) | Control | 50 | 10.45 | 3.28 | 9.8 | | 2.32 | -0.66 | 0.256 | 0.03 | No |
| Depressed Mood (HADS) | Experimental | 50 | 9.94 | 3.24 | 7.35 | | 2.46 | -2.58 | 0.000 | 0.3 | Yes |

(Table 3). *“Yes” indicates that the results are significant according to the Hospital Anxiety and Depression Scale (HADS) (Snaith). Tension, anger and stress are analysed via the Profile of Mood States (POMS-SF) (Shacham).*
